# Supplementary material
Source: publisher figshare collection journal article supplement (https://wiley.figshare.com/articles/dataset/_/3569052)
Supplement: Supplementary file 1 [file 1]

## Appendix D   Projection matrix

See figure on next page.

$$\begin{pmatrix} n_1 \\ n_2 \\ n_3 \\ n_4 \\ n_5 \\ n_6 \\ n_7 \\ n_8 \end{pmatrix}_t = \begin{pmatrix} 0 & 0 & s_{(3,t)}f_n(1-\phi_{(t)}) & 0 & 0 & s_{(6,t)}f_c(1-v)(1-\phi_{(t)}) & s_{(7,t)}f_p((1-\psi)(1-\phi_{(t)}) + \psi(1-v)(1-\phi_{(t)})) & 0 \\ s_{(1,t)}(1-m)(1-\phi_{(t)}) & 0 & 0 & 0 & 0 & 0 & 0 & 0 \\ 0 & s_{(2,t)}(1-\phi_{(t)}) & s_{(3,t)}(1-\phi_{(t)}) & 0 & 0 & 0 & 0 & 0 \\ 0 & 0 & s_{(3,t)}f_n\phi_{(t)} & 0 & 0 & s_{(6,t)}f_c(v+\phi_{(t)}-v\phi_{(t)}) & s_{(7,t)}\psi f_p(v+\phi_{(t)}-v\phi_{(t)}) + (1-\psi)\phi_{(t)} & 0 \\ s_{(1,t)}\phi_{(t)}(1-m) & 0 & 0 & s_{(4,t)}(1-m) & 0 & 0 & 0 & 0 \\ 0 & s_{(2,t)}\phi_{(t)} & s_{(3,t)}\phi_{(t)} & 0 & s_{(5,t)} & 0 & 0 & 0 \\ 0 & 0 & 0 & 0 & 0 & s_{(6,t)} & s_{(7,t)} & 0 \\ s_{(1,t)}m & 0 & 0 & s_{(4,t)}m & 0 & 0 & 0 & s_{(8,t)} \end{pmatrix}_{t-1}$$

Figure D.1: Model of brucellosis transmission in the Yellowstone bison population. Elements of the state vector  $\mathbf{n}_t$  are defined in Table 2. Definitions of parameters are  $f_n$ : number of juveniles recruited per seronegative adult female,  $f_p$ : number of juveniles recruited per seropositive adult female,  $f_c$ : number of juveniles recruited per seroconverting (infectious) adult female,  $\psi$ : proportion of recovered population that is infectious,  $v$ : probability of vertical transmission,  $\phi_{(t)}$ : probability that a susceptible female becomes exposed during  $t-1 \rightarrow t$ , and  $m$ : proportion of juveniles surviving to becomes yearling males. The survival probability  $s_{(i,t)}$  reflects natural mortality and management removals equation 3. Survival in the absence of removals is  $p_1$  for juveniles,  $p_2$  for yearling and adult females, and  $p_3$  and for yearling and adult males. We estimate  $\phi_{(t)}$  at each time step using equation 3 and  $s_{(i,t)}$  using equation 4 as described in the text. The dependence of  $\phi_{(t)}$  on  $\mathbf{n}_{(t)}$  means that the model is non-linear.
